# Supplementary material for: Reduction in Biogenic Amine Content in Baechu (Napa Cabbage) Kimchi by Biogenic Amine-Degrading Lactic Acid Bacteria
Source: MDPI journal article supplement (doi:10.3390/microorganisms9122570), 2021-12-13
Supplement: s1 [file s1]

**Table S1.** Histamine and tyramine degradation by LAB strains previously isolated from kimchi varieties.

| Kimchi Samples                |                | Number of Isolates                                | Number of BA-Degrading LAB Isolates         |         |
|-------------------------------|----------------|---------------------------------------------------|---------------------------------------------|---------|
|                               |                |                                                   | (ND / $\leq 10\%$ / $> 10\%$ ) <sup>4</sup> |         |
| Kimchi Varieties <sup>1</sup> | N <sup>2</sup> | N <sub>iso</sub> (N <sub>deg</sub> ) <sup>3</sup> | HIS <sup>5</sup>                            | TYR     |
| BC                            | 5              | 97 (0)                                            | 46/51/0                                     | 50/47/0 |
| KD                            | 5              | 88 (4)                                            | 34/51/3                                     | 20/66/2 |
| CG                            | 5              | 105 (2)                                           | 27/77/1                                     | 23/80/2 |
| YM                            | 5              | 106 (5)                                           | 39/64/3                                     | 40/61/5 |
| GK                            | 5              | 83 (8)                                            | 11/64/8                                     | 8/73/2  |
| PK                            | 5              | 53 (7)                                            | 3/44/6                                      | 6/42/5  |

<sup>1</sup> BC: *Baechu* kimchi (kimchi made mainly of napa cabbage), KD: *Kkakdugi* (kimchi made mainly of diced radish), CG: *Chonggak* kimchi (kimchi made mainly of ponytail radish), YM: *Yeolmu* kimchi (kimchi made mainly of young radish), GK: *Gat* kimchi (kimchi made mainly of mustard leaf), PK: *Pa* kimchi (kimchi made mainly of green onion).

<sup>2</sup> N: the number of samples examined.

<sup>3</sup> N<sub>iso</sub>: the number of isolated LAB strains from each kimchi sample, N<sub>deg</sub>: the number of LAB strains showing a degradation rate of histamine or tyramine over 10%.

<sup>4</sup> The number of toxic BA-degrading LAB strains classified by degradation range: ND (not detected),  $\leq 10\%$ ,  $> 10\%$  for each BA. The BA-degrading ability of LAB strains was tested in buffer.

<sup>5</sup> HIS: histamine, TYR: tyramine.

**Table S2.** Histamine and tyramine degradation by LAB strains isolated from kimchi varieties in this study.

| Kimchi Samples                |                | Number of Isolates                                | Number of BA-Degrading LAB Isolates         |            |
|-------------------------------|----------------|---------------------------------------------------|---------------------------------------------|------------|
|                               |                |                                                   | (ND / $\leq 10\%$ / $> 10\%$ ) <sup>4</sup> |            |
| Kimchi Varieties <sup>1</sup> | N <sup>2</sup> | N <sub>iso</sub> (N <sub>deg</sub> ) <sup>3</sup> | HIS <sup>5</sup>                            | TYR        |
| BC                            | 12             | 707 (45)                                          | 188/264/15                                  | 157/303/43 |
| KD                            | 1              | 150 (3)                                           | 22/52/1                                     | 34/39/2    |
| CG                            | 1              | 59 (1)                                            | 20/5/0                                      | 14/19/1    |

<sup>1</sup> BC: *Baechu* kimchi (kimchi made mainly of napa cabbage), KD: *Kkakdugi* (kimchi made mainly of diced radish), CG: *Chonggak* kimchi (kimchi made mainly of ponytail radish).

<sup>2</sup> N: the number of samples examined.

<sup>3</sup> N<sub>iso</sub>: the number of isolated LAB strains from each kimchi sample, N<sub>deg</sub>: the number of LAB strains showing a degradation rate of histamine or tyramine over 10%.

<sup>4</sup> The number of BA-degrading isolates in each degradation range was indicated as follow: ND (not detected),  $\leq 10\%$ ,  $> 10\%$  The number of toxic BA-degrading LAB strains classified by degradation range: ND (not detected),  $\leq 10\%$ ,  $> 10\%$  for each BA. The BA-degrading ability of LAB strains was tested in buffer or culture media.

<sup>5</sup> HIS: histamine, TYR: tyramine.

**Table S3.** Changes in BA content during fermentation of *Baechu* kimchi inoculated with different LAB strains capable of degrading toxic BAs.

| Kimchi<br>Groups <sup>1</sup> | Day <sup>2</sup> | BA Content (mg/kg) <sup>3</sup> |                                |                                |                                |                                |                                |
|-------------------------------|------------------|---------------------------------|--------------------------------|--------------------------------|--------------------------------|--------------------------------|--------------------------------|
|                               |                  | TYR                             | HIS                            | PUT                            | CAD                            | SPD                            | SPM                            |
| C group                       | 0                | 31.54 ± 1.68 <sup>A, b</sup>    | 27.40 ± 3.84 <sup>A, a</sup>   | 9.66 ± 0.59 <sup>B, b</sup>    | 11.91 ± 2.05 <sup>B, b</sup>   | 6.62 ± 0.53 <sup>B, b</sup>    | 29.46 ± 6.87 <sup>A, a</sup>   |
|                               | 1                | 23.35 ± 2.68 <sup>BC, b</sup>   | 17.18 ± 1.69 <sup>AB, b</sup>  | 7.60 ± 0.61 <sup>B, b</sup>    | 16.36 ± 8.18 <sup>ABC, b</sup> | 12.87 ± 4.18 <sup>AB, b</sup>  | 31.20 ± 6.16 <sup>AB, a</sup>  |
|                               | 2                | 36.80 ± 1.43 <sup>B, ab</sup>   | 11.39 ± 2.32 <sup>BC, c</sup>  | 26.56 ± 1.65 <sup>A, b</sup>   | 116.11 ± 7.20 <sup>A, a</sup>  | 18.31 ± 3.69 <sup>AB, ab</sup> | 29.26 ± 8.06 <sup>ABC, a</sup> |
|                               | 3                | 56.88 ± 1.25 <sup>C, a</sup>    | 13.57 ± 2.67 <sup>A, bc</sup>  | 56.20 ± 2.15 <sup>A, a</sup>   | 119.42 ± 4.40 <sup>A, a</sup>  | 28.37 ± 1.88 <sup>A, a</sup>   | 42.01 ± 3.63 <sup>A, a</sup>   |
| PC group                      | 0                | 35.83 ± 5.69 <sup>A, c</sup>    | 31.37 ± 6.75 <sup>A, a</sup>   | 12.25 ± 2.01 <sup>AB, ab</sup> | 14.89 ± 3.04 <sup>AB, ab</sup> | 8.09 ± 0.86 <sup>B, c</sup>    | 33.19 ± 7.31 <sup>A, a</sup>   |
|                               | 1                | 45.95 ± 1.36 <sup>A, b</sup>    | 20.69 ± 5.53 <sup>A, b</sup>   | 10.81 ± 1.63 <sup>A, b</sup>   | 11.40 ± 1.96 <sup>BC, b</sup>  | 14.91 ± 2.69 <sup>A, b</sup>   | 20.75 ± 6.74 <sup>C, b</sup>   |
|                               | 2                | 99.18 ± 7.99 <sup>A, a</sup>    | 17.30 ± 3.94 <sup>A, b</sup>   | 12.72 ± 1.55 <sup>B, ab</sup>  | 13.69 ± 3.03 <sup>B, ab</sup>  | 18.89 ± 2.86 <sup>AB, a</sup>  | 5.48 ± 0.84 <sup>D, c</sup>    |
|                               | 3                | 104.74 ± 3.04 <sup>B, a</sup>   | 15.02 ± 0.68 <sup>A, b</sup>   | 14.16 ± 1.24 <sup>B, a</sup>   | 16.72 ± 2.86 <sup>B, a</sup>   | 21.72 ± 1.23 <sup>A, a</sup>   | 4.88 ± 1.49 <sup>B, c</sup>    |
| LB group                      | 0                | 32.64 ± 0.93 <sup>A, a</sup>    | 28.34 ± 2.74 <sup>A, a</sup>   | 10.93 ± 0.58 <sup>AB, ab</sup> | 13.36 ± 1.56 <sup>AB, a</sup>  | 10.91 ± 3.38 <sup>A, c</sup>   | 32.58 ± 6.74 <sup>A, a</sup>   |
|                               | 1                | 20.72 ± 1.25 <sup>CD, b</sup>   | 15.58 ± 1.21 <sup>B, b</sup>   | 8.65 ± 1.61 <sup>B, c</sup>    | 8.69 ± 0.26 <sup>C, b</sup>    | 11.94 ± 2.52 <sup>AB, c</sup>  | 22.87 ± 5.34 <sup>BC, b</sup>  |
|                               | 2                | 20.14 ± 4.23 <sup>C, b</sup>    | 14.11 ± 3.29 <sup>ABC, b</sup> | 10.08 ± 0.83 <sup>B, bc</sup>  | 10.78 ± 1.43 <sup>B, ab</sup>  | 16.25 ± 2.05 <sup>B, b</sup>   | 28.71 ± 5.45 <sup>BC, ab</sup> |
|                               | 3                | 18.97 ± 3.14 <sup>D, b</sup>    | 13.06 ± 2.78 <sup>A, b</sup>   | 12.42 ± 0.63 <sup>B, a</sup>   | 12.83 ± 2.92 <sup>B, a</sup>   | 20.01 ± 1.00 <sup>A, a</sup>   | 30.40 ± 4.57 <sup>A, ab</sup>  |
| LT group                      | 0                | 35.03 ± 6.09 <sup>A, a</sup>    | 33.18 ± 9.88 <sup>A, a</sup>   | 12.78 ± 3.49 <sup>A, a</sup>   | 16.40 ± 5.01 <sup>A, a</sup>   | 8.54 ± 2.06 <sup>AB, c</sup>   | 33.38 ± 9.95 <sup>A, a</sup>   |
|                               | 1                | 23.41 ± 3.30 <sup>BC, b</sup>   | 17.94 ± 2.62 <sup>AB, b</sup>  | 8.57 ± 0.81 <sup>B, b</sup>    | 15.84 ± 4.60 <sup>ABC, a</sup> | 10.09 ± 1.37 <sup>B, bc</sup>  | 27.19 ± 7.84 <sup>ABC, a</sup> |
|                               | 2                | 17.06 ± 3.83 <sup>C, b</sup>    | 13.05 ± 3.10 <sup>BC, b</sup>  | 8.60 ± 1.97 <sup>B, b</sup>    | 17.74 ± 2.42 <sup>B, a</sup>   | 11.64 ± 2.38 <sup>C, b</sup>   | 22.73 ± 4.59 <sup>C, a</sup>   |
|                               | 3                | 20.12 ± 2.46 <sup>D, b</sup>    | 13.72 ± 1.84 <sup>A, b</sup>   | 10.69 ± 0.46 <sup>B, ab</sup>  | 20.90 ± 0.66 <sup>B, a</sup>   | 21.64 ± 1.52 <sup>A, a</sup>   | 33.44 ± 7.61 <sup>A, a</sup>   |
| LM group                      | 0                | 32.13 ± 1.58 <sup>A, a</sup>    | 28.52 ± 2.53 <sup>A, a</sup>   | 10.99 ± 0.85 <sup>AB, a</sup>  | 13.14 ± 1.20 <sup>AB, a</sup>  | 7.21 ± 0.31 <sup>B, d</sup>    | 29.33 ± 4.04 <sup>A, bc</sup>  |
|                               | 1                | 21.95 ± 3.42 <sup>BCD, b</sup>  | 16.45 ± 2.72 <sup>AB, b</sup>  | 8.49 ± 0.71 <sup>B, b</sup>    | 8.43 ± 1.21 <sup>C, b</sup>    | 13.69 ± 1.60 <sup>A, c</sup>   | 26.44 ± 5.37 <sup>ABC, c</sup> |
|                               | 2                | 21.85 ± 3.03 <sup>C, b</sup>    | 14.89 ± 1.97 <sup>ABC, b</sup> | 8.19 ± 0.48 <sup>B, b</sup>    | 8.86 ± 1.89 <sup>B, b</sup>    | 20.63 ± 2.53 <sup>A, b</sup>   | 36.03 ± 4.70 <sup>A, ab</sup>  |
|                               | 3                | 22.65 ± 1.58 <sup>D, b</sup>    | 13.63 ± 1.53 <sup>A, b</sup>   | 8.97 ± 0.79 <sup>B, b</sup>    | 9.27 ± 1.20 <sup>B, b</sup>    | 25.10 ± 2.25 <sup>A, a</sup>   | 40.80 ± 4.56 <sup>A, a</sup>   |
| LP group                      | 0                | 36.20 ± 1.56 <sup>A, a</sup>    | 31.73 ± 3.42 <sup>A, a</sup>   | 11.84 ± 1.56 <sup>AB, a</sup>  | 14.73 ± 1.35 <sup>AB, c</sup>  | 8.94 ± 1.61 <sup>AB, d</sup>   | 34.78 ± 5.82 <sup>A, a</sup>   |
|                               | 1                | 24.87 ± 1.71 <sup>B, b</sup>    | 18.59 ± 2.66 <sup>AB, b</sup>  | 8.84 ± 0.96 <sup>B, b</sup>    | 24.74 ± 1.27 <sup>A, bc</sup>  | 13.21 ± 1.89 <sup>AB, c</sup>  | 33.63 ± 6.61 <sup>A, a</sup>   |
|                               | 2                | 21.98 ± 1.70 <sup>C, bc</sup>   | 15.06 ± 1.45 <sup>BC, bc</sup> | 11.99 ± 2.22 <sup>B, a</sup>   | 38.88 ± 8.73 <sup>B, a</sup>   | 15.84 ± 0.88 <sup>B, b</sup>   | 31.13 ± 2.69 <sup>AB, a</sup>  |
|                               | 3                | 20.79 ± 2.54 <sup>D, c</sup>    | 13.11 ± 1.49 <sup>A, c</sup>   | 13.00 ± 1.79 <sup>B, a</sup>   | 37.15 ± 5.81 <sup>B, ab</sup>  | 20.38 ± 0.69 <sup>A, a</sup>   | 36.05 ± 5.39 <sup>B, a</sup>   |
| LS group                      | 0                | 34.00 ± 5.20 <sup>A, b</sup>    | 31.18 ± 8.37 <sup>A, a</sup>   | 11.83 ± 2.50 <sup>AB, b</sup>  | 13.80 ± 3.16 <sup>AB, b</sup>  | 7.54 ± 0.99 <sup>B, d</sup>    | 33.16 ± 9.50 <sup>A, a</sup>   |
|                               | 1                | 18.98 ± 2.23 <sup>D, c</sup>    | 14.92 ± 2.23 <sup>B, b</sup>   | 7.64 ± 0.71 <sup>B, c</sup>    | 18.48 ± 3.09 <sup>AB, b</sup>  | 12.08 ± 1.20 <sup>AB, c</sup>  | 27.95 ± 5.85 <sup>ABC, a</sup> |
|                               | 2                | 21.12 ± 2.31 <sup>C, c</sup>    | 11.02 ± 1.58 <sup>C, b</sup>   | 11.62 ± 1.24 <sup>B, b</sup>   | 117.13 ± 4.21 <sup>A, a</sup>  | 15.38 ± 1.22 <sup>B, b</sup>   | 36.51 ± 5.21 <sup>A, a</sup>   |
|                               | 3                | 119.99 ± 1.49 <sup>A, a</sup>   | 10.19 ± 0.79 <sup>B, b</sup>   | 19.81 ± 2.08 <sup>B, a</sup>   | 95.89 ± 2.82 <sup>A, a</sup>   | 22.90 ± 1.43 <sup>A, a</sup>   | 7.20 ± 1.65 <sup>A, b</sup>    |

Values are presented as mean ± standard deviation calculated from duplicated experiments. Values in the same column of different groups sampled on the same day followed by a different uppercase letter (A–D) are significantly different ( $p < 0.05$ ). Values in the same column of the same group sampled on different days followed by a different lowercase letter (a–d) are significantly different ( $p < 0.05$ ).

<sup>1</sup> C group: naturally fermented control, PC group: positive control inoculated with tyramine-producing *L. brevis* PK11, LB group: BA-degrading *L. brevis* PK08, LT group: BA-degrading *L. pentosus* PK05, LM group: BA-degrading *Leu. mesenteroides* YM20, LP group: BA-degrading *L. plantarum* KD15, LS group: BA-degrading *L. sakei* YM21.

<sup>2</sup> Fermentation period.

<sup>3</sup> TYR: tyramine, HIS: histamine, PUT: putrescine, CAD: cadaverine, SPD: spermidine, SPM: spermine.
