# Supplementary material for: Reduction in Biogenic Amine Content in Baechu (Napa Cabbage) Kimchi by Biogenic Amine-Degrading Lactic Acid Bacteria
Source: MDPI journal article supplement (doi:10.3390/microorganisms9122570), 2021-12-13
Supplement: s1 [file s1]

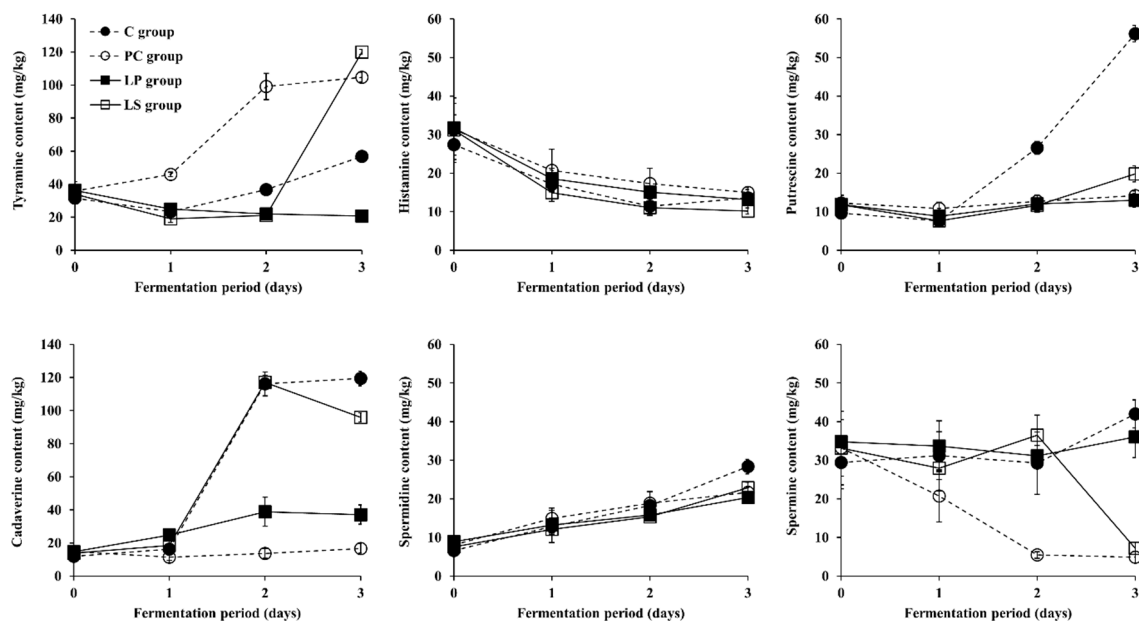

**Figure S1.** Changes in BA content in *Baechu* kimchi inoculated with other selected LAB strains during fermentation. ●: C group without an inoculum (control), ○: PC group inoculated with tyramine-producing *L. brevis* isolated from kimchi product (positive control), ■: LP group inoculated with BA-degrading *L. plantarum* KD15, □: LS group inoculated with BA-degrading *L. sakei* YM21. Error bars indicate the standard deviations determined from duplicate experiments.
